# Supplementary material for: Reciprocal activity of AgRP and POMC neurons governs coordinated control of feeding and metabolism
Source: PubMed Central journal article supplement (PMC10963273; doi:10.1038/s42255-024-00987-z), 2024-02-20
Supplement: 42255_2024_987_MOESM1_ESM.pdf [file 42255_2024_987_MOESM1_ESM.pdf]

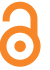

---

# Reciprocal activity of AgRP and POMC neurons governs coordinated control of feeding and metabolism

---

In the format provided by the authors and unedited

---

(AgRP-Cre) AAV-flex-tdTomato

(POMC-Dre) AAV-flex-ZsGreen

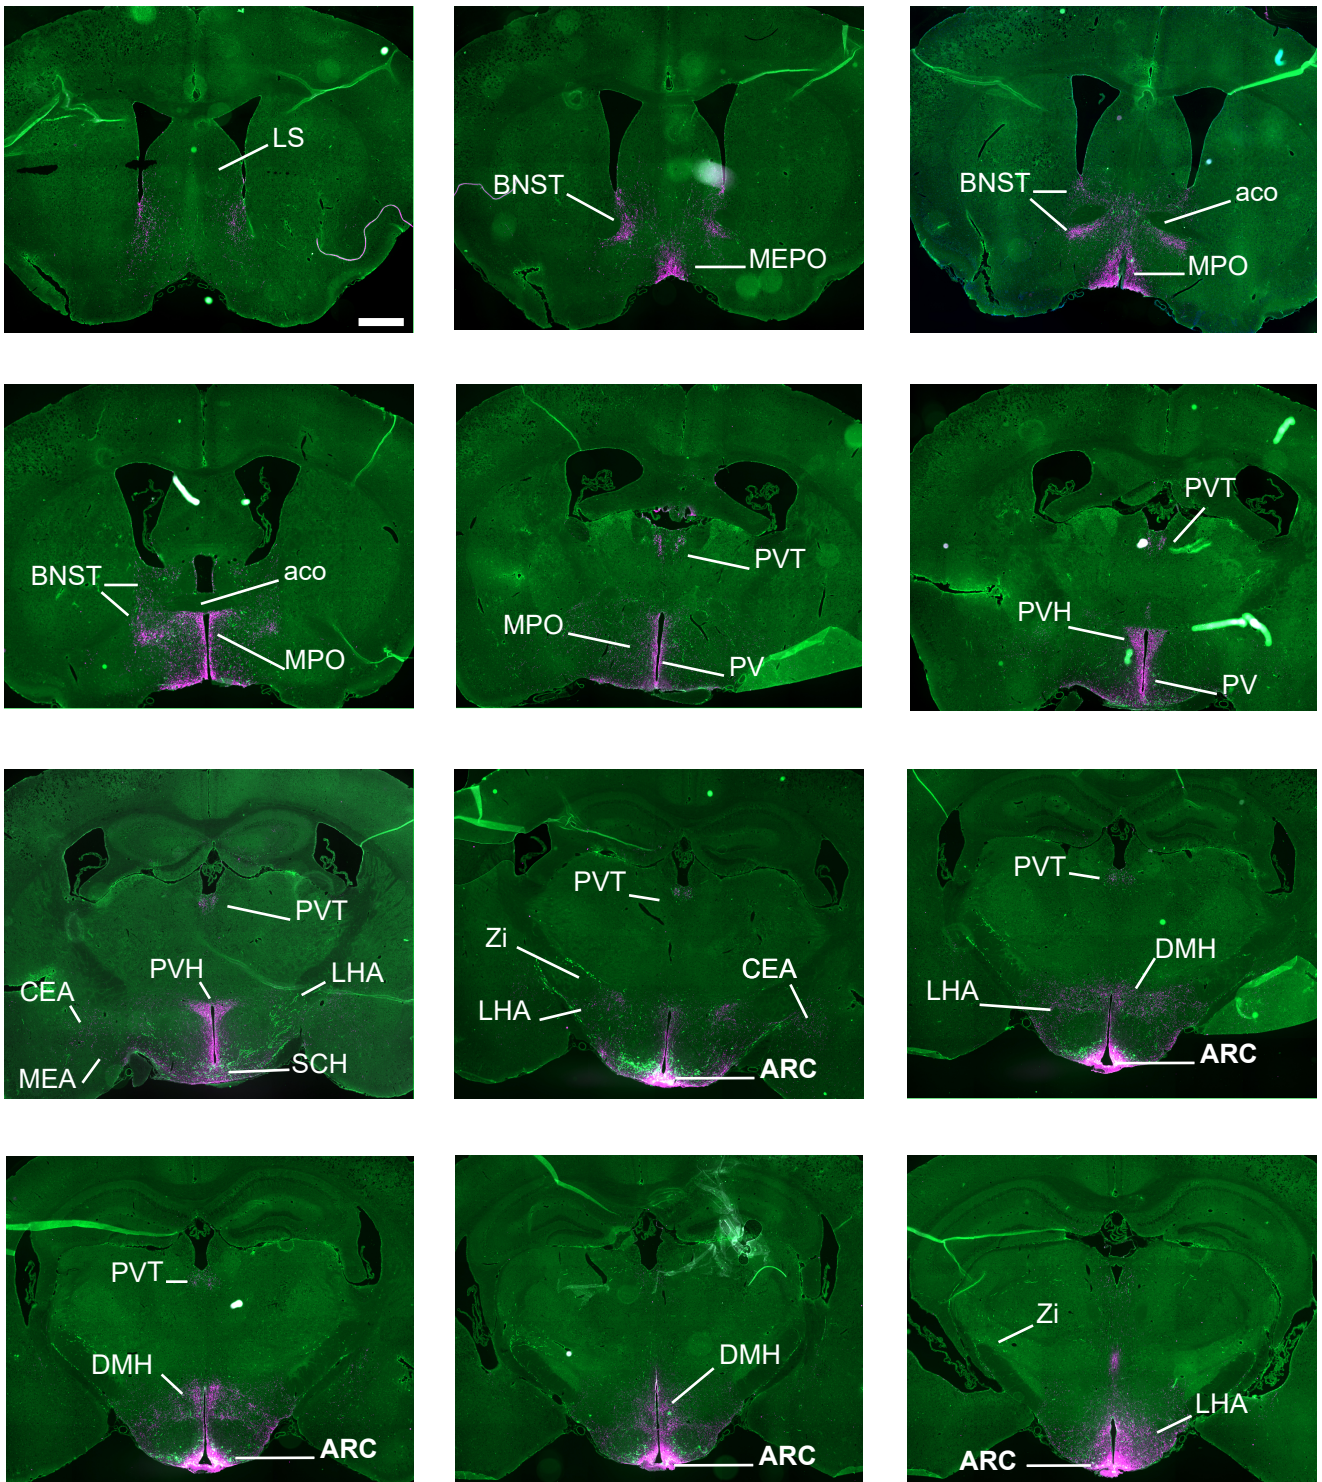

LS: Lateral septum  
BNST: Bed nuclei of the stria terminalis  
MEPO: Median preoptic nucleus  
aco: anterior commissure  
MPO: Medial preoptic nucleus  
PVT: Paraventricular nucleus of the thalamus  
PV: Periventricular nucleus  
PVH: Periventricular nucleus of the hypothalamus

LHA: Lateral hypothalamus  
SCH: Suprachiasmatic nucleus  
CEA: Central amygdala area  
MEA: Medial amygdala area  
Zi: zona incerta  
ARC: Arcuate nucleus of the hypothalamus  
DMH: dorsomedial hypothalamic nucleus

**Supplementary Figure 1 (1/2). De Solis AJ et al.**



(AgRP-Cre) AAV-flex-tdTomato

(POMC-Dre) AAV-flex-ZsGreen

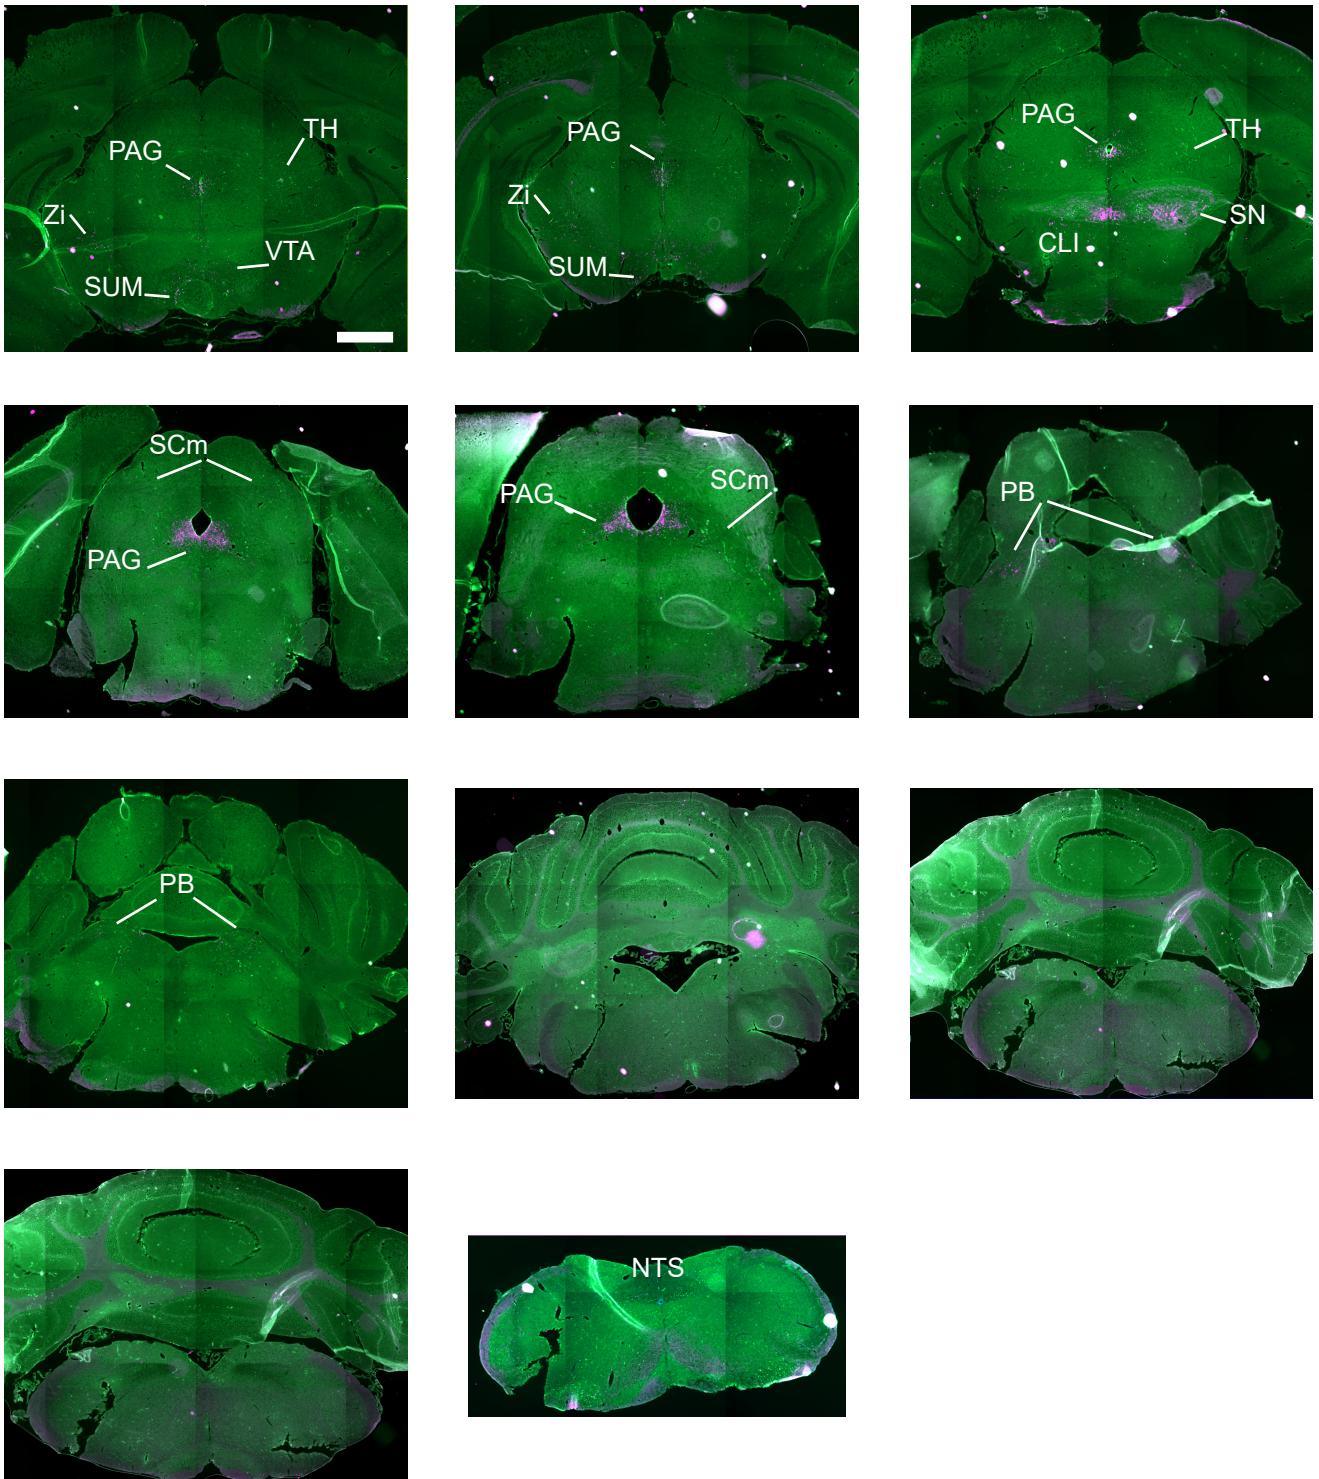

ZI: Zona incerta: Xona incerta  
VTA: Ventral tagmenetal area  
SUM: Suprammiliary nucleus  
TH: Thalamus  
CLI: Raphe,central linear nucleus

SN: Substancia nigra  
PAG: Periaqueductal grey  
SCm: Superior culliculus, motor related  
PB: Parabranqial nucleus  
NTS: Nucleus of the tractus solitarius

Supplementary Figure 1 (2/2). De Solis AJ et al

**Supplementary Figure 1. Whole brain distribution of overlapping AgRP and POMC axonal projections.** Representative coronal images show the distribution of AgRP<sup>+</sup> (magenta) and POMC<sup>+</sup> (green) axonal projections after bilateral injection of AAV-flex-tdTomato and AAV-frex-ZsGreen into the ARC area of AgRP-Gq;POMC-Gi mice (n = 2). Scale bar = 200  $\mu$ m.

| Downstream area |                                                         | AgRP-tdTomato projections | POMC-ZsGreen projections |
|-----------------|---------------------------------------------------------|---------------------------|--------------------------|
| LS              | Lateral septum                                          | ++                        | +                        |
| BNST anterior   | Bed nucleus of the striata terminals, anterior area     | +++                       | +                        |
| BNST medial     | Bed nucleus of the striata terminals, medial area       | +++                       | ++                       |
| BNST posterior  | Bed nucleus of the striata terminals, posterior area    | +++                       | +                        |
| NDB             | Diagonal band nucleus                                   | ++                        | --                       |
| MS              | Medial septum nucleus                                   | +                         | --                       |
| LPO             | Lateral preoptic area                                   | --                        | --                       |
| ACB medial      | Nucleus accumbens                                       | ++                        | +                        |
| MEPO            | Median preoptic nucleus                                 | ++                        | +                        |
| MPO             | Medial preoptic area                                    | +++                       | ++                       |
| PAL / MA        | Pallidum, magnocellular nucleus                         | +                         | --                       |
| PVT anterior    | Paraventricular nucleus of the thalamus, anterior area  | ++                        | +                        |
| PVT medial      | Paraventricular nucleus of the thalamus, medial area    | +                         | +                        |
| PVT posterior   | Paraventricular nucleus of the thalamus, posterior area | --                        | --                       |
| AHN             | Anterior nucleus of the hypothalamus                    | +                         | ++                       |
| PVH             | Paraventricular nucleus of the hypothalamus             | ++++                      | ++                       |
| LHA             | Lateral hypothalamic area                               | ++                        | +++                      |
| AAA             | Anterior hypothalamic nucleus                           | +                         | +                        |
| CEA             | Central amygdalar nucleus                               | +                         | +                        |
| MEA             | Medial amygdalar nucleus                                | +                         | --                       |
| PVi             | Periventricular hypothalamic nucleus                    | ++                        | --                       |
| VMH             | Ventromedial hypothalamic nucleus                       | --                        | --                       |
| TU              | Tuberal nucleus                                         | ++                        | ++                       |
| DMH             | Dorsomedial hypothalamic nucleus                        | +++                       | +                        |
| Zi              | Zona incerta                                            | +                         | --                       |
| Zi, posterior   | Zona incerta, posterior part                            | --                        | +                        |
| PVp             | Periventricular hypothalamic nucleus                    | +++                       | +                        |
| PH              | Posterior hypothalamic nucleus                          | +++                       | +                        |
| ME              | Median eminence                                         | +                         | +                        |
| PAG, anterior   | Periaqueductal grey, anterior area                      | ++                        | +                        |
| PAG, posterior  | Periaqueductal grey, posterior area                     | +++                       | +                        |
| SC              | Superior colliculus, motor related area                 | +                         | ++                       |
| VTA             | Ventral tegmental area                                  | ++                        | --                       |
| APN             | Anterior pretectal nuclei (Thalamus region)             | --                        | ++                       |
| CLI             | Central linear nucleus raphe                            | ++                        | --                       |
| SNc             | Substantia nigra, compact part                          | --                        | +                        |
| PB              | Parabrachial nucleus                                    | ++                        | +                        |
| RM              | Nucleus of the raphe magnus                             | --                        | +                        |
| PCG             | Pontine central grey                                    | +                         | +                        |
| GRN             | Gigantocellular reticular nucleus                       | --                        | +                        |
| NTS             | Nucleus of the solitary tract                           | +                         | +                        |
| AP              | Area postrema                                           | --                        | --                       |

**Supplementary Figure 2. De Solis AJ et al.**



**Supplementary Figure 2. List of brain areas receiving AgRP and POMC axonal projections.** Quantification of intensity was performed by direct visual inspection for each channel independently ( $n = 2$  mice). Area nomenclature is based on Allen mouse brain atlas.

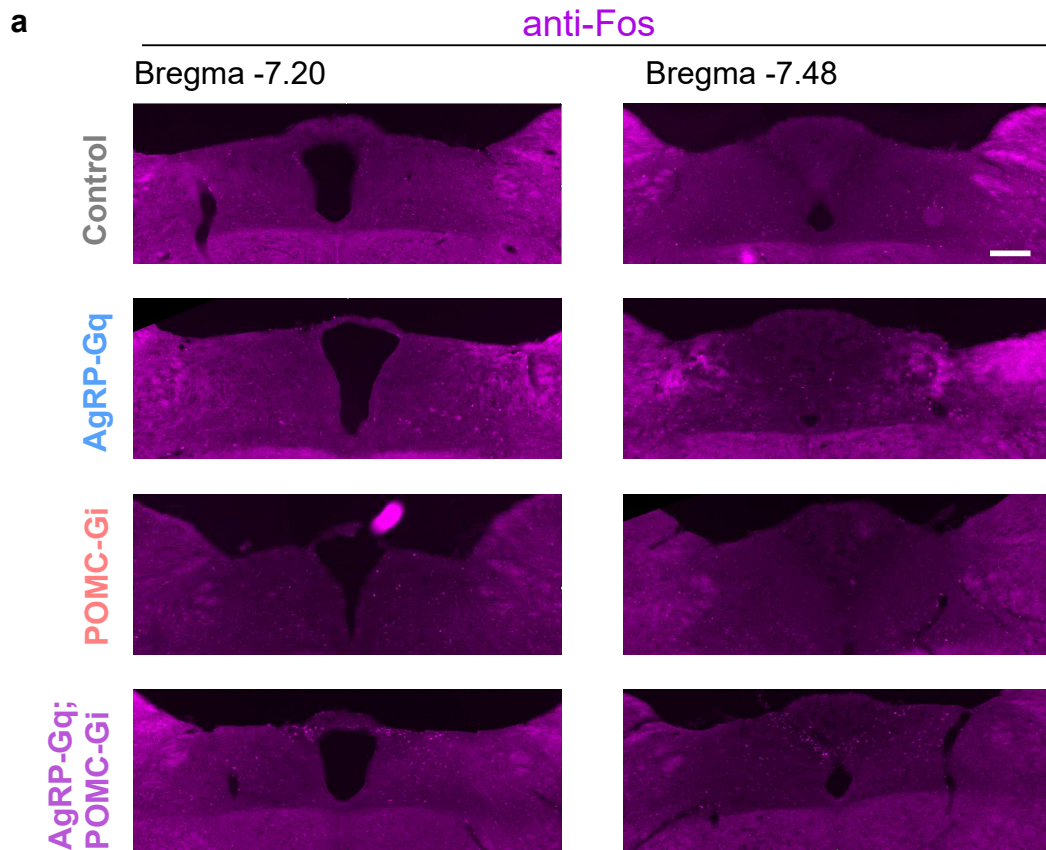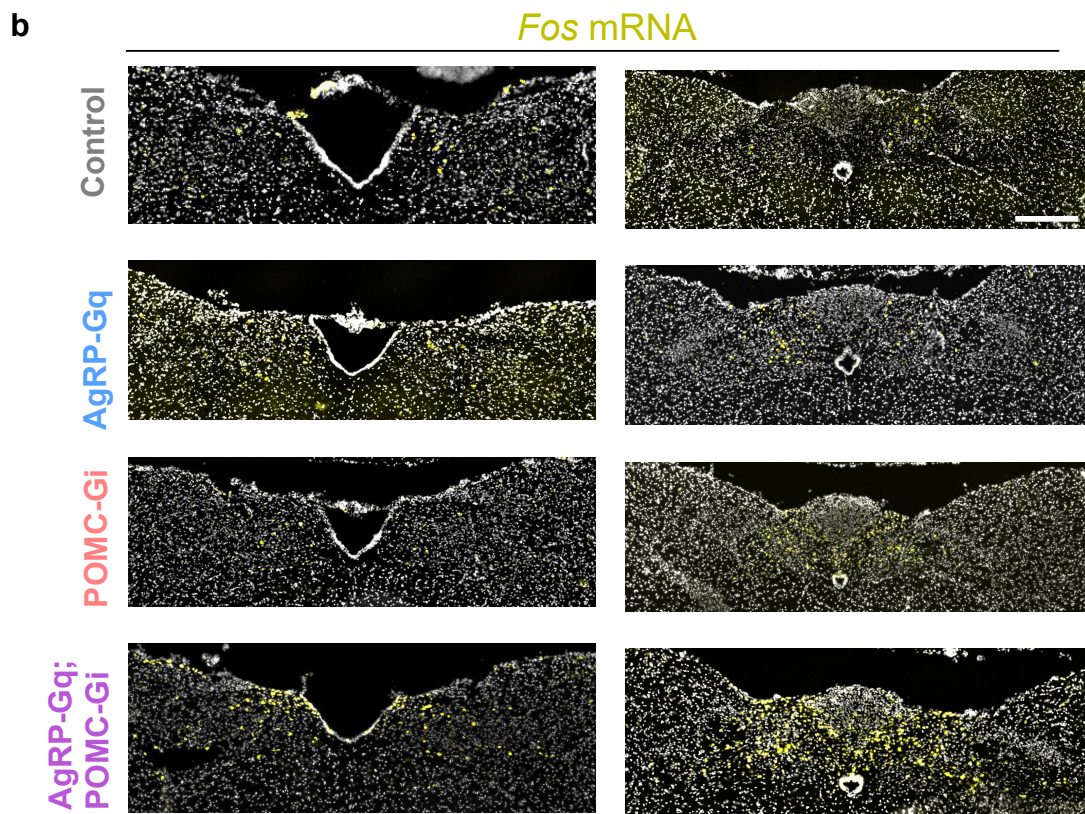

Supplementary Figure 3. De Solis AJ *et al.*

**Supplementary Figure 3. Fos distribution in the NTS area after chemogenetic intervention.** **a**, Representative pictures of Fos protein expression in medial (bregma -7.20) and posterior (bregma -7.48) NTS area. **b**, Representative images of Fos mRNA expression in medial and posterior NTS area from mice of the four experimental groups treated with CNO. Quantification of Fos protein showed in **Fig. 3h** and quantification of *Fos*<sup>+</sup> mRNA cells showed in **Fig. 3i**.



**Npy1R-Cre (PVH) + AAV-flox-tdTomato**

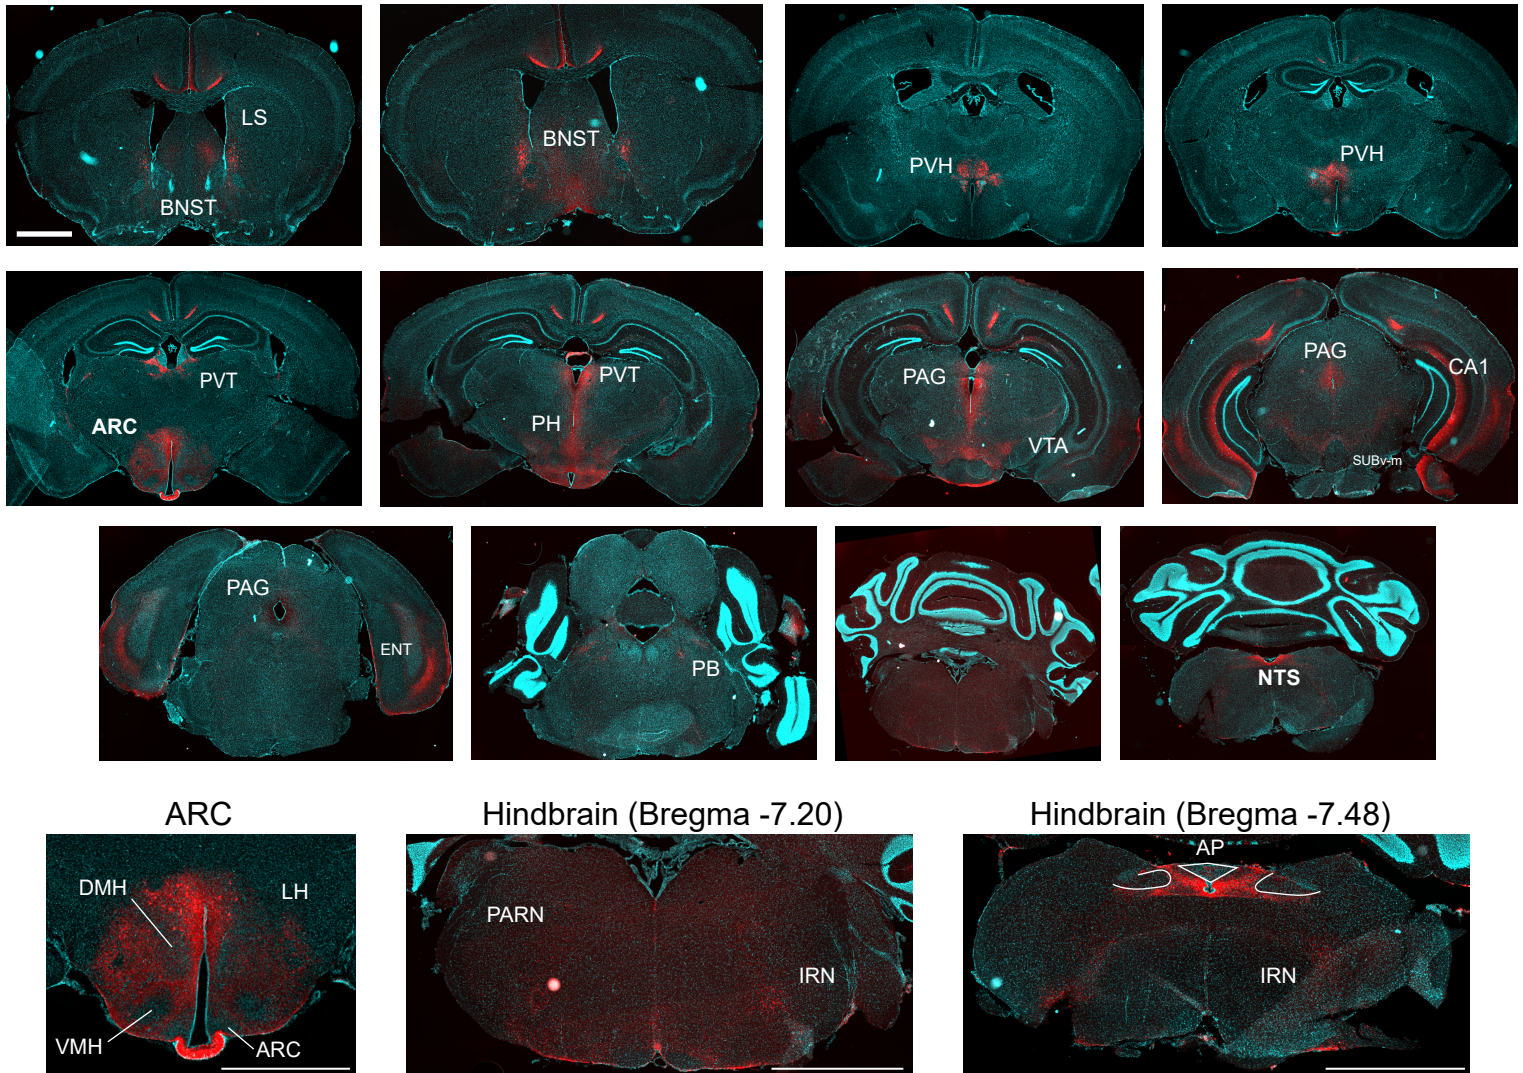

ARC: Arcuate nucleus of the hypothalamus

AP: Area postrema

BNST: Bed nucleus of the stria terminales

DMH: Dorsomedial nucleus of the hypothalamus

ENT: Entorhinal area

IRN: Intermediate reticular nucleus

LH: Lateral hypothalamus

LS: Lateral septum

ME: Mediam eminence

NTS: Nucleus of the tractus solitarius

PAG: Periaqueductal gray

PARN: Parvocellular reticular nucleus

PBN: Parabraquial nucleus

PVH: Paraventricular nucleus of the hypothalamus

PVT: Paraventricular nucleus of the thalamus

SUBV-m: Subcubiculum ventral, molecular layer

VHM: Ventromedial nucleus of the hypothalamus

VTA: Ventral tegmental area

**Supplementary Fig. 4. De Solis AJ et al.**

**Supplementary Figure 4. Npy1R<sup>PVH</sup> axonal projections into hindbrain region.**

Representative images of stained axonal projections (red) from Npy1R<sup>PVH</sup>-TdTomato<sup>+</sup> neurons across the whole brain. Images selected from one mouse within 3 biological replicates. Lower panels showed the distribution of Npy1R-Tomato<sup>+</sup> fibers around the main nuclei in the ventral hypothalamus (left) and in the hindbrain at the level of medial NTS area (bregma – 7.20) and posterior NTS/AP area (bregma -7.48), where the medial part of the posterior NTS receives extensive Npy1R<sup>PVH</sup> projections, while AP and DMV areas receive less axonal projections. Scale bar = 1500  $\mu$ m.

| RNAscope probes | Reference | Dilution | Accession number |
|-----------------|-----------|----------|------------------|
| AgRP            | #400711   | 1:2      | NM_001271806.1   |
| POMC            | #314081   | 1:4      | NM_008895.3      |
| Fos             | #316921   | 1:1      | NM_010234.2      |
| ZsGreen         | #461251   | 1:1      | JQ071441.1       |
| eGFP            | #400281   | 1:1      | NM_U55763.1      |
| Cre             | #312281   | 1:1      | KC845567.1       |
| Dre             | #442641   | 1:1      | N/A              |
| MC4R            | #319181   | 1:1      | NM_016977.4      |
| Npy1R           | #427021   | 1:1      | NM_010934.4      |
| Glp1R           | #418851   | 1:1      | NM_021332.1      |
| Pdyn            | #318771   | 1:1      | NM_018863.3      |
| Slc17a6         | #319171   | 1:1      | NM_080853.3      |
| Slc32a1         | #319191   | 1:1      | NM_009508.2      |
| Th              | #317621   | 1:1      | NM_009377.1      |
| Dbh             | #407851   | 1:1      | NM_138942.3      |

| Type of antibodies                 | Company                  | Reference   | Dilution |
|------------------------------------|--------------------------|-------------|----------|
| Histology. Primary antibodies      |                          |             |          |
| rabbit anti-ZsGreen                | Takara Bio Clontech      | 632474      | 1:100    |
| rat anti-mCherry (for tdTomato)    | Thermo Fisher Scientific | M11217      | 1:1,000  |
| goat anti-tdtomato                 | SiCGen                   | #AB8181     | 1:500    |
| rabbit c-Fos                       | Cell signalling          | #2250       | 1:1000   |
| Histology Secondary antibodies     |                          |             |          |
| donkey anti-rabbit Alexa Fluor 488 | Thermo Fisher            | A21206      | 1:500    |
| donkey anti-rat Alexa Fluor 594    | Jackson ImmunoResearch   | 712-585-153 | 1:500    |
| goat anti-rabbit Alexa Fluor 594   | Thermo Fisher Scientific | A11012      | 1:500    |
| Whole brain immunohistology        |                          |             |          |
| rabbit c-Fos                       | Cell signalling          | #2250       | 1:1000   |
| donkey-anti-rabbit-Alexa647        | Invitrogen/Thermo        | A31573      | 1:1000   |

| Other reagents               | Company                  | Reference     |
|------------------------------|--------------------------|---------------|
| Taqman qPCR probes           |                          |               |
| Hprt                         | Thermo Fisher Scientific | Mm01545399_m1 |
| G6pc                         | Thermo Fisher Scientific | Mm00839363_m1 |
| Pck1                         | Thermo Fisher Scientific | Mm01247058_m1 |
| Addgene virus stocks         |                          |               |
| AAV1-flex-TdTomato           | Addgene                  | # 28306       |
| AAV1-CAG-Frex-ZsGreen        | Addgene                  | #52521        |
| AAV8-hSyn-DIO-hM4DGi-mCherry | Addgene                  | # 44362       |

**Supplementary Figure 5. De Solis et al. .**
